# Supplementary material for: Optimizing CdTe–metal interfaces for high performance solar cells
Source: Royal Society of Chemistry journal article supplement (doi:10.1039/c7ta00698e), 2017-01-01
Supplement: c7ta00698e1.pdf [file c7ta00698e1.pdf]

## Supplementary Information

### Interfacial Properties of CdTe-Metal Contacts for Solar Cells

Sibai Li, Zhi Peng, Jiaxin Zheng,\* and Feng Pan\*

School of Advanced Materials, Peking University, Shenzhen Graduate School,

Shenzhen 518055, China

\*Email: zhengjx@pkusz.edu.cn and panfeng@pkusz.edu.cn

## Supplementary Results and Discussions

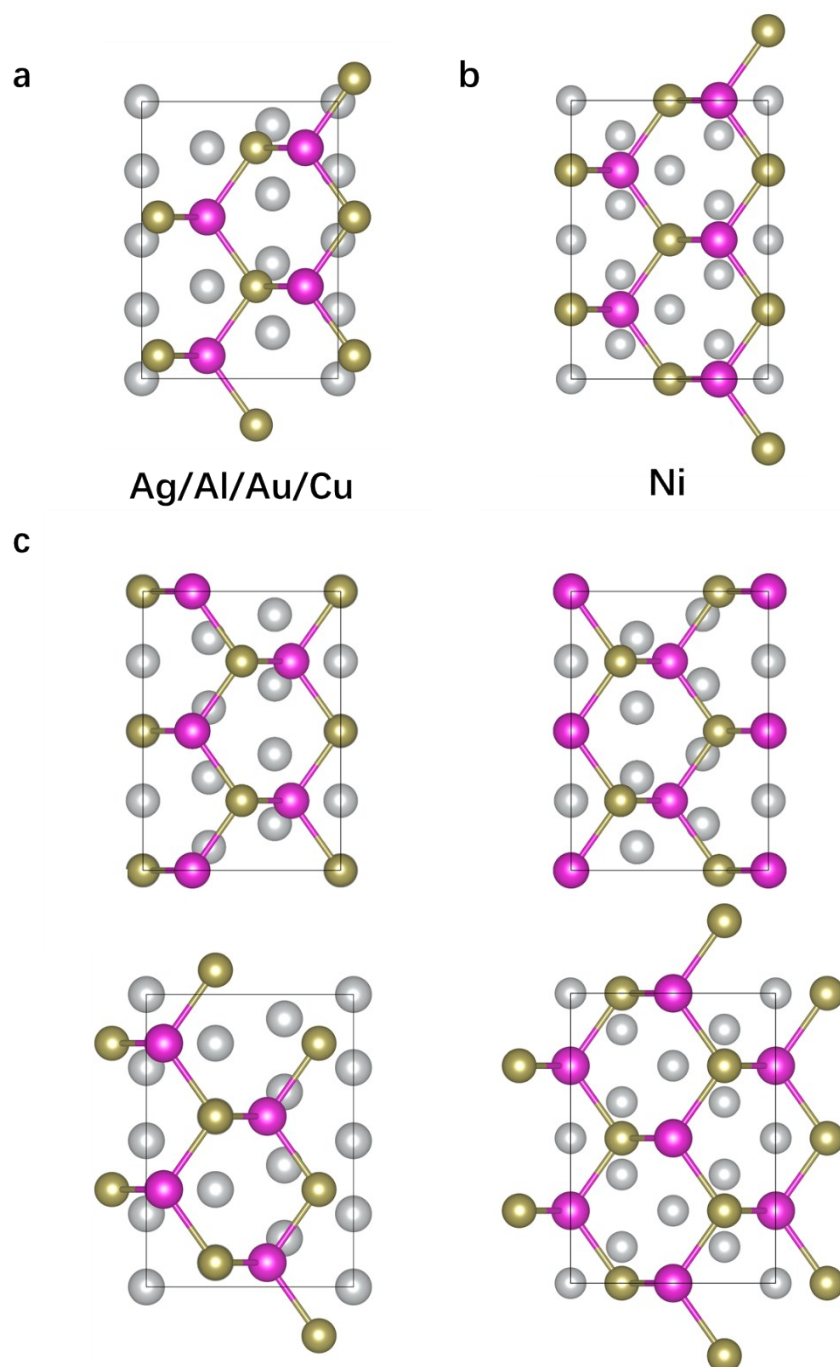

Fig. S1. Interfacial structures of the configurations of CdTe (110) on metal surfaces. (a) Top view of the most stable configuration of CdTe-Ag/Al/Au/Cu surface. (b) Top view of the most stable configuration of CdTe-Ni surface. (c) other configurations we considered.

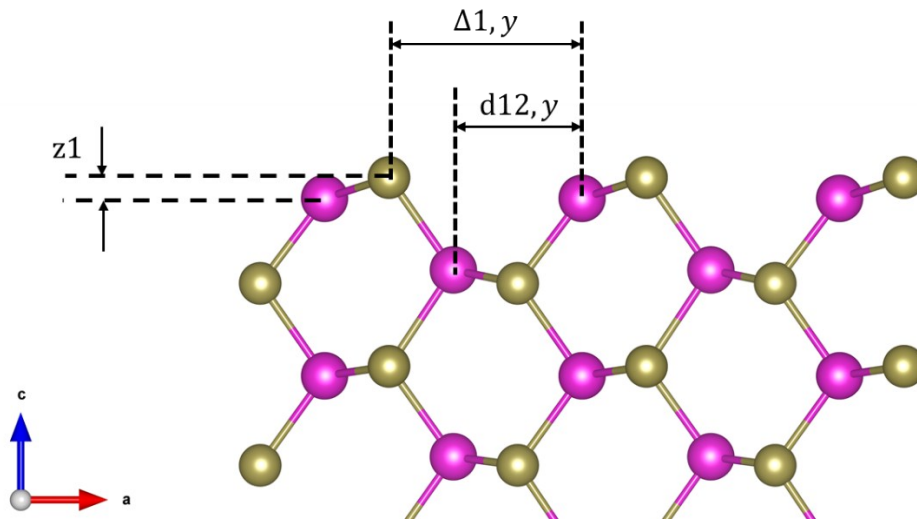

Fig. S2. Side view of the surface geometry of CdTe(110) surface.

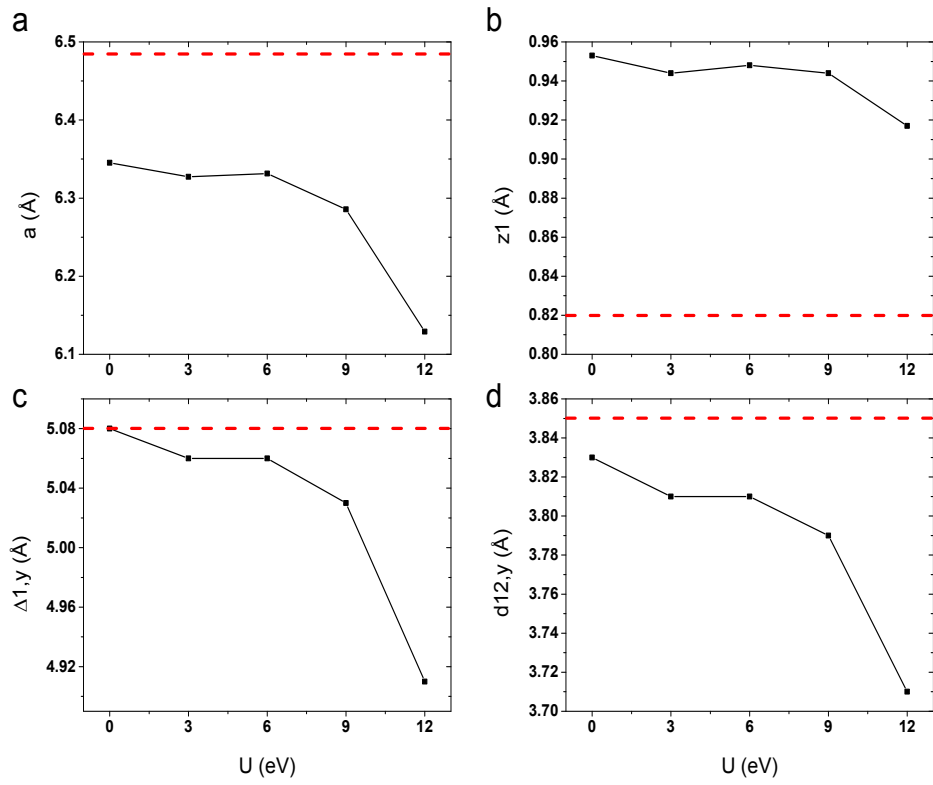

Fig. S3. Test for different values of  $U$ . (a) calculated lattice parameter  $a$ . (b) calculated  $z_1$ . (c) calculated  $\Delta_{1,y}$ . (d) calculated  $d_{12,y}$ . The red dash is the result from LEED.
